# Supplementary material for: Emotional Effects in Object Recognition by the Visually Impaired People in Grocery Shopping
Source: MDPI journal article supplement (doi:10.3390/s22218442), 2022-11-03
Supplement: s1 [file s1]

**Table S1.** Summary details of behavioral, self-report, and autonomic data for visually impaired and control group (Mean  $\pm$  Standard Deviation)

|                         |                                                      | Visually impaired group | Control group     |
|-------------------------|------------------------------------------------------|-------------------------|-------------------|
| <i>Behavioral data</i>  | ACC fruit                                            | 1.89 $\pm$ 0.33         | 2.00 $\pm$ 0.00   |
|                         | ACC pasta                                            | 1.22 $\pm$ 0.67         | 2.00 $\pm$ 0.00   |
|                         | ACC frozen food                                      | 1.44 $\pm$ 0.53         | 2.00 $\pm$ 0.00   |
|                         | RTs fruit                                            | 24.76 $\pm$ 7.90        | 28.96 $\pm$ 9.99  |
|                         | RTs pasta                                            | 27.27 $\pm$ 7.98        | 19.43 $\pm$ 7.30  |
|                         | RTs frozen food                                      | 27.89 $\pm$ 6.07        | 19.56 $\pm$ 7.44  |
| <i>Self-report data</i> | Perceived stress level                               | 3.00 $\pm$ 1.58         | 2.50 $\pm$ 1.38   |
|                         | Disorientation                                       | 3.11 $\pm$ 1.69         | 1.42 $\pm$ 0.67   |
|                         | Enjoyable experience level                           | 5.33 $\pm$ 2.29         | 4.92 $\pm$ 1.38   |
|                         | Simplicity in finding products                       | 3.33 $\pm$ 1.00         | 4.75 $\pm$ 0.62   |
|                         | Self confidence in repeating the route independently | 2.78 $\pm$ 1.30         | 4.92 $\pm$ 0.29   |
| <i>Autonomic data</i>   | SCL fruit                                            | 1.87 $\pm$ 1.95         | 8.36 $\pm$ 12.61  |
|                         | SCL pasta                                            | 2.09 $\pm$ 2.44         | 9.28 $\pm$ 12.25  |
|                         | SCL frozen food                                      | 2.17 $\pm$ 2.98         | 8.33 $\pm$ 10.49  |
|                         | SCR fruit                                            | 0.01 $\pm$ 0.02         | -0.02 $\pm$ 0.11  |
|                         | SCR pasta                                            | 0.01 $\pm$ 0.04         | 0.02 $\pm$ 0.05   |
|                         | SCR frozen food                                      | -0.04 $\pm$ 0.10        | -0.03 $\pm$ 0.10  |
|                         | BVP fruit                                            | 49.91 $\pm$ 0.34        | 49.81 $\pm$ 0.35  |
|                         | BVP pasta                                            | 49.43 $\pm$ 0.72        | 49.99 $\pm$ 0.42  |
|                         | BVP frozen food                                      | 49.79 $\pm$ 0.76        | 49.97 $\pm$ 0.59  |
|                         | PVA fruit                                            | 26.36 $\pm$ 22.18       | 15.16 $\pm$ 8.86  |
|                         | PVA pasta                                            | 39.52 $\pm$ 15.49       | 14.98 $\pm$ 11.58 |
|                         | PVA frozen food                                      | 32.94 $\pm$ 17.16       | 10.94 $\pm$ 4.13  |
|                         | PULS fruit                                           | 69.49 $\pm$ 12.72       | 75.10 $\pm$ 12.67 |
|                         | PULS pasta                                           | 69.88 $\pm$ 11.54       | 77.56 $\pm$ 16.91 |
|                         | PULS frozen food                                     | 70.86 $\pm$ 11.94       | 75.22 $\pm$ 8.12  |

Abbreviations: ACC, Accuracy; RTs, Reaction Times; SCL, Skin Conductance Level; SCR, Skin Conduct Response; BVP, Blood Volume Pulse; PVA, Pulse Volume Amplitude
